# Supplementary material
Source: publisher figshare collection journal article supplement (https://karger.figshare.com/ndownloader/files/27774996)
Supplement: Supplementary file 1 [file 27774996]

**Supplementary table 1. Cumulative recurrence-free and overall survival of patients who underwent no additional treatment or rescue surgery**

|  | **Observation**  **(n = 23)** | **Surgery**  **(n = 29)** |
| --- | --- | --- |
| **Incidence of recurrence** |  |  |
| Person-years | 61.5 | 99.8 |
| Incident cases of recurrence | 3 | 5 |
| Incidence rate per 100 person-years | 4.9 | 5.0 |
| **Cumulative overall survival rate (%)** |  |  |
| 1 year | 95.7 | 100 |
| 2 years | 86.3 | 96.4 |
| 3 years | 86.3 | 96.4 |
| **Cumulative recurrence free survival rate (%)** |  |  |
| 1 year | 85.0 | 100 |
| 2 years | 85.0 | 92.6 |
| 3 years | 85.0 | 88.7 |
| **Disease-specific survival rate (%)** |  |  |
| 1 year | 100 | 100 |
| 2 years | 95.2 | 96.4 |
| 3 years | 95.2 | 96.4 |
